# Supplementary material for: Discrete Survival Model Analysis of Plasmodium falciparum Response to Artemisinin-Based Combination Therapies among Children in Regions of Varying Malaria Transmission in Cameroon
Source: MDPI journal article supplement (doi:10.3390/pathogens10091106), 2021-08-30
Supplement: s1 [file s1]

**Supplementary Table S1. An example of data transformed to person-data time for fitting discrete time survival model using logistic regression**

| Patient ID | Site code | Drug | Age group | Temp (°C) | Par (/μl) | Cleared | Visit day |
|------------|-----------|------|-----------|-----------|-----------|---------|-----------|
| 3          | 1         | ASAQ | 0         | 38        | 52,400    | 0       | 0         |
| 3          | 1         | ASAQ | 0         | 36        | 240       | 0       | 1         |
| 3          | 1         | ASAQ | 0         | 36        | 0         | 1       | 2         |
| 4          | 1         | AL   | 0         | 38        | 14,320    | 0       | 0         |
| 4          | 1         | AL   | 0         | 37        | 160       | 0       | 1         |
| 4          | 1         | AL   | 0         | 37        | 0         | 1       | 2         |

*Legend: "cleared" is the event status variable and "visit day" is the observed discrete time*
